# Supplementary material for: Immobilization of an antimicrobial peptide on silicon surface with stable activity by click chemistry
Source: Royal Society of Chemistry journal article supplement (doi:10.1039/c7tb02557b), 2017-11-15
Supplement: c7tb02557b1.pdf [file c7tb02557b1.pdf]

*Supporting Information*

**Immobilization of Antimicrobial Peptide on Silicon Surface with  
Stable Activity by Click Chemistry**

Jingcai He,<sup>a</sup> Junjian Chen,<sup>a</sup> Guansong Hu,<sup>b</sup> Lin Wang,<sup>\*a</sup> Jian Zheng,<sup>a</sup> Jiezhao Zhan,<sup>b</sup>

Yuchen Zhu,<sup>b</sup> Chunting Zhong,<sup>a</sup> Xuetao Shi,<sup>a</sup> Sa Liu,<sup>a</sup> Yingjun Wang<sup>ab</sup> and Li Ren<sup>\*b</sup>

a. School of Materials Science and Engineering, South China University of  
Technology, Guangzhou 510641, China. \*E-mail: wanglin3@scut.edu.cn

b. National Engineering Research Center for Tissue Restoration & Reconstruction,  
South China University of Technology, Guangzhou 510006, China. \*E.mail:  
psliren@scut.edu.cn

## Experimental

### The 9.10-phenantroquinone assay for the Maillard-type reaction

The 9.10-phenantroquinone assay was employed to characterize the Maillard-type reaction between the Arginine in the PraAMP and the ascorbic acid sodium salt as follows.

First, the calibration curve of the free PraAMP was prepared. Briefly, the peptide powder was dissolved with distilled water to achieve the concentration of 100  $\mu\text{M}$ , 50  $\mu\text{M}$ , 25  $\mu\text{M}$ , 12.5  $\mu\text{M}$  and 6.25  $\mu\text{M}$ . Then 100  $\mu\text{L}$  of the peptide solution was mixed with 300  $\mu\text{L}$  of 9.10-phenantroquinone (3.23 mM). The mixture was incubated at 30  $^{\circ}\text{C}$  for 3 h. After that, 225  $\mu\text{L}$  of HCl (2.4 M) was added to stop the reaction. The fluorescence emission intensity was measured at 380 nm by the ELISA plate reader (Varioskan Flash 3001, Thermo, Finland) with the excitation wave-length of 256 nm.

After that, three solutions were prepared:

**Group A:** 250  $\mu\text{L}$  of the PraAMP solution (100  $\mu\text{M}$ );

**Group B:** 250  $\mu\text{L}$  of the L-ascorbic acid sodium salt solution (6 mM);

**Group C:** 250  $\mu\text{L}$  of the mixture of PraAMP and L-ascorbic acid sodium salt (100  $\mu\text{M}$  of PraAMP and 6 mM of L-ascorbic acid sodium).

The three groups were incubated at 37  $^{\circ}\text{C}$ . After 2 h of reaction, 100  $\mu\text{L}$  of each solution was taken for 9.10-phenantroquinone assay as above.

**Fig. S1** The mass spectrometry of PraAMP.

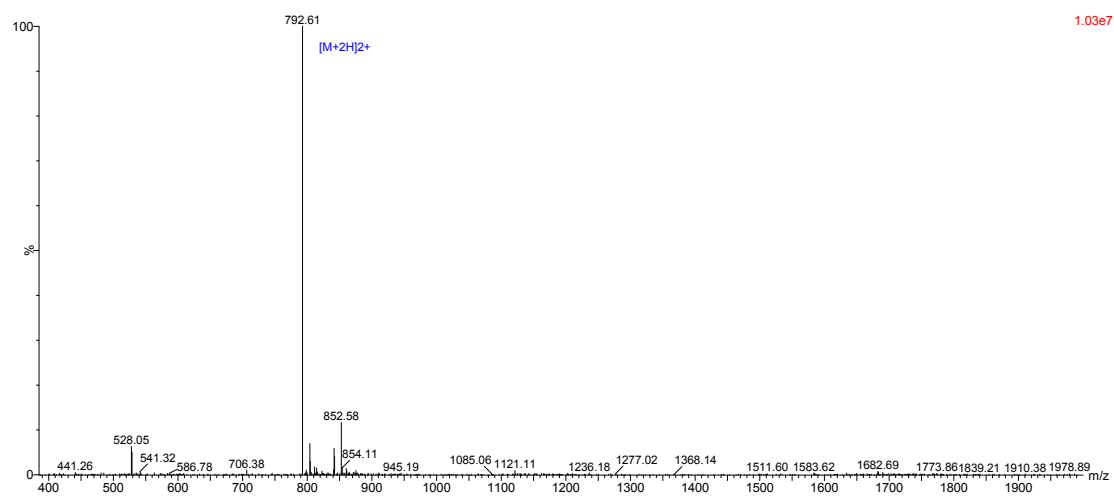

**Fig. S2** The circular dichroism spectra of AMP and PraAMP.

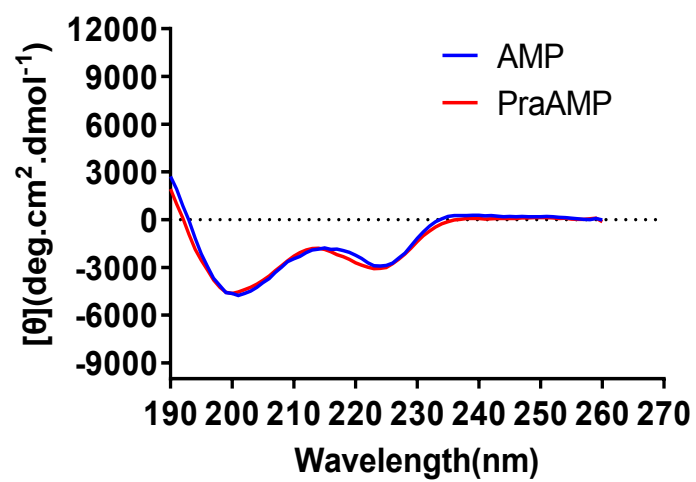

**Fig. S3** The antimicrobial activity of the indicated surface against *S.aureus* in medium after 2 h of culture.

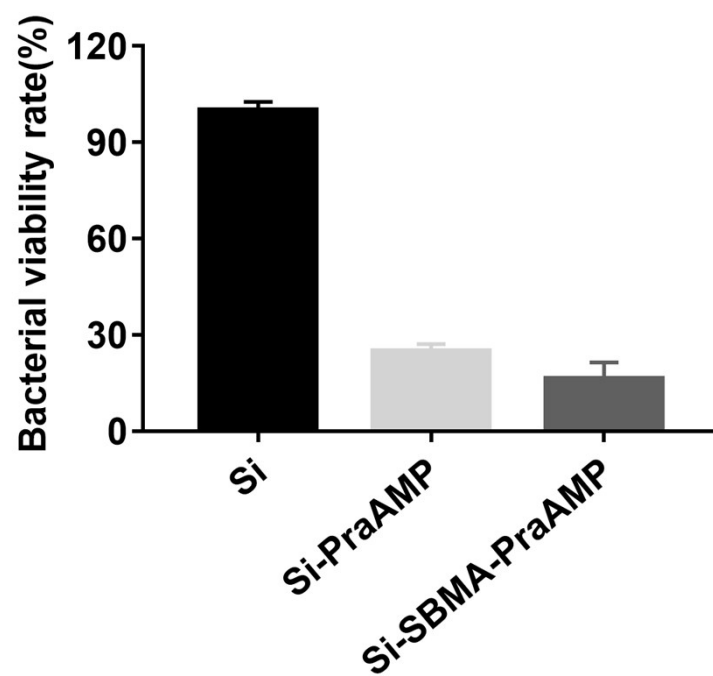

**Fig. S4** The antimicrobial activity of the indicated surface against *P. aeruginosa* in medium after 2 h of culture.

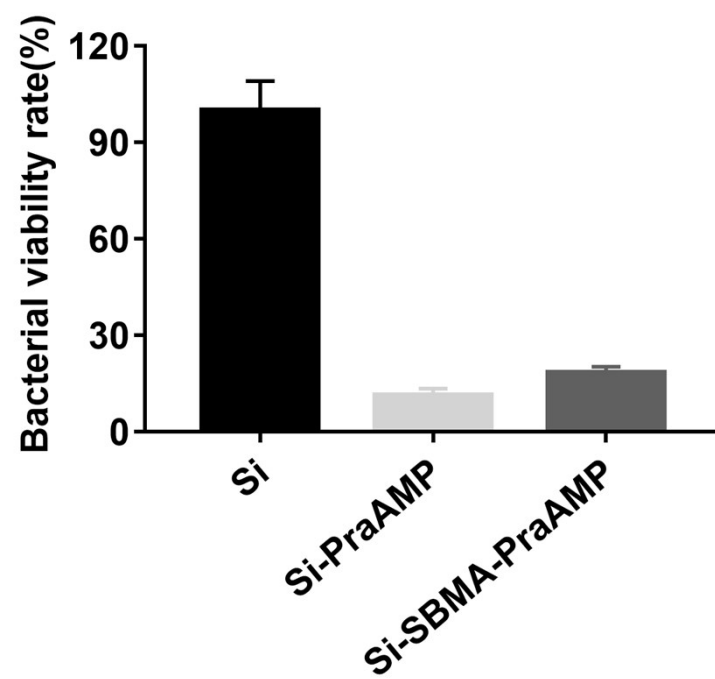

**Fig. S5** The calibration curve of free PraAMP from the 9.10-phenantroquinone assay.

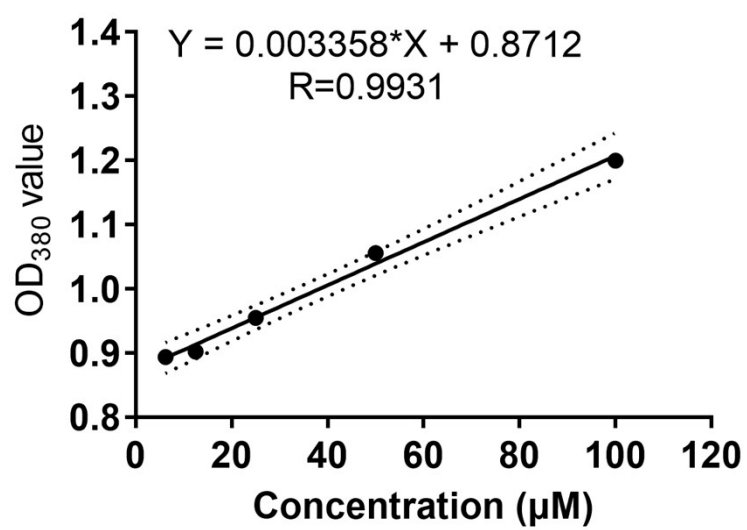

**Table. S1** OD<sub>380</sub> values of the indicated groups

|                            | A      | B      | C     |
|----------------------------|--------|--------|-------|
| OD <sub>380</sub> value    | 1.2170 | 0.8515 | 1.076 |
| Peptide concentration (μM) | 100    | 0      | 61    |
